# Supplementary material
Source: MDPI journal article supplement (https://www.mdpi.com/2673-7272/3/2/14)
Supplement: s1 [file s1]

Archive with 2 entries (2 files):
- disabilities-2283408-Supplementary File S1.pdf
- disabilities-2283408-Supplementary Table S1.pdf
