# Supplementary material
Source: MDPI journal article supplement (https://www.mdpi.com/2673-7272/3/2/14)
Supplement: s1 [file s1 › disabilities-2283408-Supplementary File S1.pdf]

## Supplementary Materials

### File S1: Questionnaire

Q1 What is your age?

Q2 What gender do you identify as?

- ☐ Male (1)
- ☐ Female (2)
- ☐ Non-binary (3)
- ☐ Prefer not to say (4)

Q3 In what county do you live in?

Q4 Are you a family or professional carer for an adult(s) with intellectual disability?

- ☐ Family carer (1)
- ☐ Professional carer (2)

### Family Carers: General Decision-Making

Q14 In your opinion, what effect has the COVID-19 pandemic had on the choice/decision-making opportunities of your family member with ID?

Q15 Supported decision-making can be defined as “*allow[ing] individuals with disabilities to make choices about their own lives with support from a team of people they choose. Individuals with disabilities choose people they know and trust to be part of a support network to help with decision-making*” (supporteddecisions.org).

Do you engage in supported decision-making with your family member with ID?

- ☐ Yes (1)
- ☐ No (2)

Q16 If yes, please describe how you usually engage in supported decision-making with your family member with ID. If no, please write not applicable.

Q17 Please tell us about the kinds of decisions you help your family member with.

Q18 Have you received advice or support from the HSE/other disability organisations on how to encourage independence and choice making in your family member with ID?

☐ Yes (1)

☐ No (2)

Q19 If yes, please describe the advice or support received. If no, please write not applicable.

Q20 Have you received advice from any organisation on how to explain the COVID-19 public health regulations to your family member with ID?

☐ Yes (1)

☐ No (2)

Q21 If yes, please describe the advice received. If no, please write not applicable

### **Family: Work and care information**

Q22 In addition to your care duties, are you:

☐ Employed full-time (1)

☐ Employed part-time (2)

☐ Not currently employed (3)

☐ Retired (4)

Q23 What is your relationship to your family member with ID?

Q24 What is the living situation of your family member with ID?

☐ Cohabiting with family (1)

☐ Cohabiting with friends (2)

☐ Residential service facility (3)

☐ Long-term care facility (i.e., nursing home) (4)

☐ Living independently with professional support (5)

☐ Living independently with familial support (6)

**Family: Not Cohabiting: Residential or Long-Term Care**

Q25 Have you received updates or information from the residential or care facility about their COVID-19 policies?

☐ Yes (1)

☐ No (2)

Q26 How often do you receive these updates?

☐ More than once a week (1)

☐ Weekly (2)

☐ Monthly (3)

☐ Never (4)

Q27 Has your family member or any other resident contracted COVID-19?

☐ Yes (1)

☐ No (2)

Q28 If yes, please describe how this situation was approached by the residential or long-term service. If no please write not applicable.

Q29 Since the introduction of COVID-19 mitigation measures, how often have you been able to visit your family member with ID in the residential or long-term service?

☐ Regularly (1)

☐ Often (2)

☐ Seldom (3)

☐ Never (4)

Q30 Please provide further details here.

**Family: Not Cohabiting: Cohabiting with Friends/Living independently**

Q31 Has the COVID-19 pandemic affected the availability of professional support for your family member with ID living independently?

- ☐ Not at all (1)
- ☐ Somewhat (2)
- ☐ Very much (3)

Q32 Please provide further details here.

Q33 Has the COVID-19 pandemic affected the availability of familial support for your family member with ID living independently?

- ☐ Not at all (1)
- ☐ Somewhat (2)
- ☐ Very much (3)

Q34 Please provide further details here.

Q35 Has your family member with ID or another member of their household contracted COVID-19?

- ☐ Yes (1)
- ☐ No (2)

Q36 If yes, please describe how this situation was approached by the family or professional support workers. If no, please write not applicable.

### **Professional Carers: Work information**

Q5 What setting do you work in?

- ☐ Public sector (1)
- ☐ Semi-state company (2)
- ☐ Private sector as an employee (3)
- ☐ Private sector as self-employed person (4)
- ☐ Other (5)

Q6 Is your work full- or part-time?

☐ Full-time (1)

☐ Part-time (2)

Q7 How many adults with intellectual disability (ID) do you care for?

Q8 Supported decision-making is defined by [supporteddecisions.org](https://supporteddecisions.org) as follows:

*“Supported decision-making (SDM) allows individuals with disabilities to make choices about their own lives with support from a team of people they choose. Individuals with disabilities choose people they know and trust to be part of a support network to help with decision-making.”*

Please describe how the practice of supported decision-making is approached by your organisation/employer. If you have no information for this, please write not applicable.

Q9 Please describe any challenges you have faced in practicing supported decision-making in your workplace as a result of the COVID-19 pandemic.

Q10 In your opinion, what effect has the COVID-19 pandemic had on the independence and choice making opportunities of adults with ID in your place of employment?

Q11 In your opinion, what impact have visiting restrictions had on the independence and decision-making of adults with ID in your place of employment?

Q12 Has your place of employment experienced any cases of COVID-19 among staff or service users?

☐ Yes (1)

☐ No (2)

Q13 If yes, please describe how this situation was managed. In particular, we are interested to learn about any impacts on staff and/or service users. If no, please write not applicable.
