# Supplementary material
Source: MDPI journal article supplement (https://www.mdpi.com/2673-7272/3/2/14)
Supplement: s1 [file s1 › disabilities-2283408-Supplementary Table S1.pdf]

## Supplementary Materials

**Table S1.** CHERRIES checklist for survey trustworthiness.

| Item Category                                                                               | Checklist Item                      | Explanation                                                                                                                                                                                                                                                                                                                                                                                                                              |
|---------------------------------------------------------------------------------------------|-------------------------------------|------------------------------------------------------------------------------------------------------------------------------------------------------------------------------------------------------------------------------------------------------------------------------------------------------------------------------------------------------------------------------------------------------------------------------------------|
| <b>Design</b>                                                                               | Describe survey design              | Target population was professional or family carers of a person(s) with intellectual disabilities over 18 years living in the Republic of Ireland. This was an open survey and collected a convenience sample of participants.                                                                                                                                                                                                           |
|                                                                                             |                                     | 1. Survey was approved by Maynooth University Social Science Ethics review board                                                                                                                                                                                                                                                                                                                                                         |
| <b>IRB (Institutional Review Board) approval and informed consent process</b>               | 1. IRB Approval                     | 2. Participants were shown an information and consent page where they were told the purpose of the survey, what their participation would involve, who approved the study, confirmation that all participation was voluntary and could be ceased at any time prior to submission of answers, what data would be stored, and who the investigator was.                                                                                    |
|                                                                                             | 2. Informed consent                 |                                                                                                                                                                                                                                                                                                                                                                                                                                          |
|                                                                                             | 3. Data protection                  | 3. Data was securely collected using Qualtrics an encrypted, password protected survey site. Information was accessible only to the primary investigator (HC) via a password protected Qualtrics portal hosted by the university.                                                                                                                                                                                                        |
| <b>Development and Pre-testing</b>                                                          | Development and testing             | Survey questions were developed using relevant literature on COVID-19 and supported decision-making. Due to the use of open-ended questions, Braun and Clarke's 2021 paper on the use of surveys as a qualitative tool was used as a guide for construction. Qualtrics allows the survey to be previewed and tested before publication. This was done by (HC) and (DD) with adjustments to layout and content made prior to publication. |
| <b>Recruitment process and description of the sample having access to the questionnaire</b> |                                     | 1. This was an open survey hosted on Qualtrics                                                                                                                                                                                                                                                                                                                                                                                           |
|                                                                                             | 1. Open survey versus closed survey | 2. Contact with participants was made via twitter, and via email requests to disability services, and academics in the field of disability to circulate the link among their colleagues and families of service users.                                                                                                                                                                                                                   |
|                                                                                             | 2. Contact mode                     |                                                                                                                                                                                                                                                                                                                                                                                                                                          |
|                                                                                             | 3. Advertising the survey           | 3. The survey was advertised in a tweet from (HC)'s project twitter account, and via circulation by the above-named groups who agreed to assist.                                                                                                                                                                                                                                                                                         |

|                              |                                             |                                                                                                                                                                                                                                                                                                                          |
|------------------------------|---------------------------------------------|--------------------------------------------------------------------------------------------------------------------------------------------------------------------------------------------------------------------------------------------------------------------------------------------------------------------------|
| <b>Survey administration</b> |                                             | 1. The survey was hosted on Qualtrics and distributed via a link                                                                                                                                                                                                                                                         |
|                              |                                             | 2. Qualtrics is a secure site used to create and host surveys. It is considered secure as it encrypts the information and uses a password protected portal linked to the institution or university the creator is associated with to ensure security of information and GDPR compliance.                                 |
|                              | 1. Web/email                                | 3. The survey was voluntary. Participation was entirely decided by the potential participant choosing to click on the link.                                                                                                                                                                                              |
|                              | 2. Context                                  | 4. No incentives were offered                                                                                                                                                                                                                                                                                            |
|                              | 3. Mandatory/voluntary                      | 5. The survey was open between July and December 2021                                                                                                                                                                                                                                                                    |
|                              | 4. Incentives                               | 6. Due to the nature of this survey (. i.e., as a remote qualitative data collection method) randomisation of questions was not used.                                                                                                                                                                                    |
|                              | 5. Time/date                                | 8. Adaptive questioning was used based on participant confirmation of family versus professional carer, and upon family participants confirming the living arrangements of the person they cared for                                                                                                                     |
|                              | 6. Randomisation of items or questionnaires | 8. The questionnaire was distributed over five pages for family participants, and four for professionals.                                                                                                                                                                                                                |
|                              | 7. Adaptive questioning                     | 9. Completeness was checked after next or submit was clicked, with unanswered questions requesting a response before moving forward. All open-ended questions could be answered with n/a or rather not say if desired by participants. Selection of at least one response option was enforced for demographic questions. |
|                              | 8. Number of items                          | 10. Participants could not review responses                                                                                                                                                                                                                                                                              |
| <b>Response Rates</b>        | 9. Completeness check                       |                                                                                                                                                                                                                                                                                                                          |
|                              | 10. Review step                             |                                                                                                                                                                                                                                                                                                                          |
|                              | 1. Unique site visitor                      | 1. Qualtrics has a “prevent multiple submissions” feature which uses cookies to prevent the same person submitting data more than once                                                                                                                                                                                   |
|                              | 2. View rate                                | 2. Not collected                                                                                                                                                                                                                                                                                                         |
|                              | 3. Participation rate                       |                                                                                                                                                                                                                                                                                                                          |
|                              | 4. Completion rate                          |                                                                                                                                                                                                                                                                                                                          |

|                                                             |                                                     |                                                                                                                                                                                                                                                                                                                                    |
|-------------------------------------------------------------|-----------------------------------------------------|------------------------------------------------------------------------------------------------------------------------------------------------------------------------------------------------------------------------------------------------------------------------------------------------------------------------------------|
|                                                             |                                                     | 3. 37 out of 37, 100%                                                                                                                                                                                                                                                                                                              |
|                                                             |                                                     | 4. 16 out of 37, 43.2%                                                                                                                                                                                                                                                                                                             |
| <b>Preventing multiple entries from the same individual</b> | 1. Cookies used                                     | 1. Qualtrics applies cookies to the browser of the participant preventing the use of the survey link more than once.                                                                                                                                                                                                               |
|                                                             | 2. IP check                                         | 2. IP addresses were not used                                                                                                                                                                                                                                                                                                      |
|                                                             | 3. Log file check                                   | 3. Due to the qualitative nature of the survey, open ended question responses were checked against demographic information to identify any potential duplicate entries                                                                                                                                                             |
|                                                             | 4. Registration                                     |                                                                                                                                                                                                                                                                                                                                    |
|                                                             |                                                     | 4. Not applicable                                                                                                                                                                                                                                                                                                                  |
| <b>Analysis</b>                                             | 1. Handling of incomplete questionnaires            | 1. Only completed questionnaires were analysed. Early termination questionnaires were not analysed. All incomplete questionnaires were terminated either a. directly after the consent page was passed, or b. following input of demographic information. No incomplete questionnaire provided information that could be analysed. |
|                                                             | 2. Questionnaires submitted with atypical timestamp |                                                                                                                                                                                                                                                                                                                                    |
|                                                             | 3. Statistical correction                           | 2. No such questionnaires were found                                                                                                                                                                                                                                                                                               |
|                                                             |                                                     | 3. Not applicable (qualitative survey)                                                                                                                                                                                                                                                                                             |
